# Supplementary material for: Metabolomics of four TCM herbal products: application of HPTLC analysis
Source: Royal Society of Chemistry journal article supplement (doi:10.1039/c2ay25373a), 2012-01-01
Supplement: c2ay25373a.pdf [file c2ay25373a.pdf]

## Supplementary Information

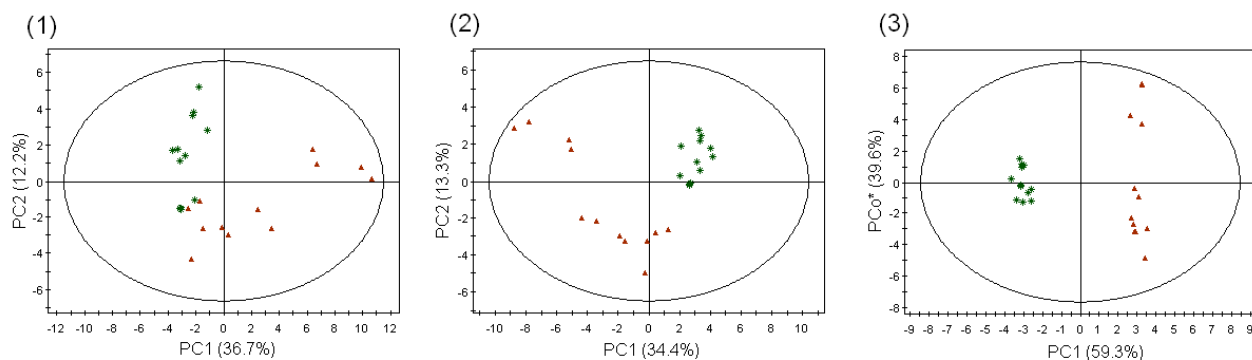

S.I. Fig. 1: 2D-score plots of *Gentiana* samples only (*G. rigescens* and *G. macrophylla*). (1) PCA, (2) PLS-DA and (3) O-PLS-DA. (★ GR; ▲ GM)

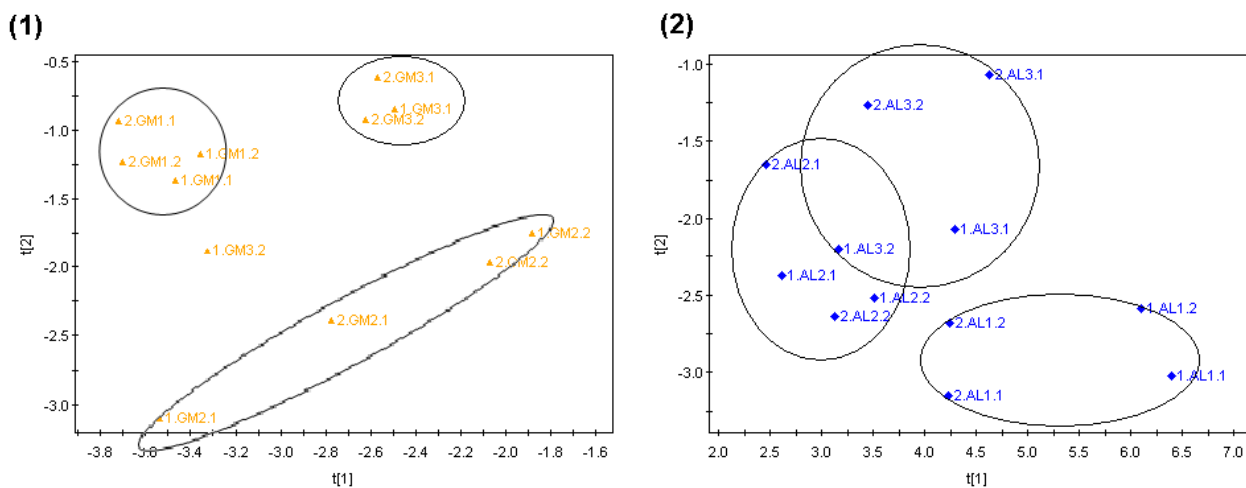

S.I. Fig. 2: PLS-DA 2D-score plot showing the discrimination of three sample sources clustering in 2 different herbal samples: (1) *Gentiana macrophylla* and (2) *Atractylodes lancea*.
